# Supplementary material for: The role of pontine lesion location in differentiating multiple sclerosis from vascular risk factor-related small vessel disease
Source: PubMed Central journal article supplement — Mult Scler. 2020 Aug 6;27(6):968–72. doi: 10.1177/1352458520943777 (PMC8114427; doi:10.1177/1352458520943777), 2020-08-06
Supplement: MSJ943777_supplemental_material.pdf [file MSJ943777_supplemental_material.pdf]

## Supplemental material

### Supplemental table 1

| Site                                                                                                                                             | T1 and FLAIR                                                                            |                                                                      |
|--------------------------------------------------------------------------------------------------------------------------------------------------|-----------------------------------------------------------------------------------------|----------------------------------------------------------------------|
|                                                                                                                                                  | MS                                                                                      | Non-MS                                                               |
| <b>Graz</b><br>Number cases<br>Voxel size<br>- FLAIR<br>- T1<br>FLAIR TE, TR<br>% (n) Central pons lesions<br>% (n) Peripheral pons lesions      | <b>36</b><br><br>0.86x0.86x3 mm<br>1x0.5x0.5 mm<br>69, 9000<br>11.1 (4)<br>27.8 (10)    | NA                                                                   |
| <b>London</b><br>Number cases<br>Voxel size<br>- FLAIR<br>- T1<br>FLAIR TE, TR<br>% (n) Central pons lesions<br>% (n) Peripheral pons lesions    | <b>54</b><br><br>1x1x3mm<br>1x1x3mm<br>25, 8000<br>7.4 (4)<br>40.7 (22)                 | NA                                                                   |
| <b>Amsterdam</b><br>Number cases<br>Voxel size<br>- FLAIR<br>- T1<br>FLAIR TE, TR<br>% (n) Central pons lesions<br>% (n) Peripheral pons lesions | <b>34</b><br><br>0.97x0.97x1 mm<br>0.94x0.94x1 mm<br>129.5, 8000<br>8.6 (3)<br>20.0 (7) | <b>17</b><br><br>1.3x1.3x1.3<br>1x1.1mm<br>385, 6500<br>5.9 (1)<br>0 |
| <b>Rome</b><br>Number cases<br>Voxel size<br>- FLAIR<br>- T1<br>FLAIR TE, TR<br>% (n) Central pons lesions<br>% (n) Peripheral pons lesions      | <b>33</b><br><br>0.48x0.48x3.3<br>1x1x1 mm MS<br>89, 9000<br>6.1 (2)<br>33.3 (11)       | NA                                                                   |
| <b>Barcelona</b><br>Number cases<br>Voxel size<br>- FLAIR<br>- T1<br>FLAIR TE, TR<br>% (n) Central pons lesions<br>% (n) Peripheral pons lesions | <b>43</b><br><br>1x1x1 mm<br>1x1x1 mm<br>394, 5000<br>2.3 (1)<br>27.9 (12)              | <b>26</b><br><br>1x1x3mm<br>1x1x1 mm<br>93, 9000<br>23.1 (6)<br>0    |
